# Supplementary material
Source: PubMed Central journal article supplement (PMC2592927)
Supplement: supp_74_23_7108__1.pdf [file supp_74_23_7108__1.pdf]

**Supplementary Table 1**

Oligonucleotides used in this study.

| Oligonucleotide | Sequence                                             | Size |        |
|-----------------|------------------------------------------------------|------|--------|
|                 |                                                      | WT   | Mutant |
| 1062-1          | ATGAAAATGATGAGAAAAACATTGTTGGC                        | 457  |        |
| 1062-2          | GCTAAAGTTACGTGCTGAAACGTTCTTGA<br>TAATGTTCTGGGTTGTAGC |      |        |
| 1062-3          | GCTACAACCCAGAACATTATCAAGAACGT<br>TTCAGCACGTAACCTTAGC | 447  |        |
| 1062-4          | TTACAGGTCGACTAAAATTGTCTTAGTCG                        |      |        |
| 1062-5          | AAACTCGGACAACAGATCCG                                 | 2757 | 904    |
| 1062-6          | ATCCTCATGATAGAGCCTGC                                 |      |        |
| 2864-1          | ATGGCTCTTTTACATAAACCTTCATTGC                         | 341  |        |
| 2864-2          | GTAGCCGTAGTTCTTGGTAATCATCGTCAC<br>CATTGTGATTAGCAATC  |      |        |
| 2864-3          | GATTGCTAATCACAATGGTGACGATGATT<br>ACCAAGAACTACGGCTAC  | 341  |        |
| 2864-4          | TTACTTACGACGACGCCACATTGC                             |      |        |
| 2864-5          | TCGATGAACTTAGGTGAAACG                                | 2595 | 682    |
| 2864-6          | GTTTATTATGACTCGAAAAGCC                               |      |        |
| 576-1           | ATGAGCAAGGAAACATTTGATAGC                             | 500  |        |
| 576-2           | CCAAATACGAAGATATCCCAATCTCGTAT<br>GTTGGACCATTAGTGTG   |      |        |
| 576-3           | CACACTAATGGTCCAACATACGAGATTGG<br>GATATCTTCGTATTTGG   | 465  |        |
| 576-4           | TTAAACTGCGATTCACCGCC                                 |      |        |
| 576-5           | TAAAGTCAGCCAACAGGAAGC                                | 2028 | 965    |
| 576-6           | GCTGATCTTAGCTAGATTTGC                                |      |        |
| 2984fd1         | ATGGAAAACCTCAAACATCTAC                               |      |        |
| 2984rev1        | TTAAAATGCTTCTTCGAGCG                                 |      |        |
| 2985fd1         | GTGGACATCAATCTAGACATTC                               |      |        |
| 2985rev1        | AATAGCCATTGATTCAAAGGC                                |      |        |
| 2986fd1         | ATGAAAAAGTTAATCGCACTAGGC                             |      |        |
| 2986rev1        | TTAATCACGACGACCTATAAGC                               |      |        |
| 2987fd1         | ATGATTCGTCATATTCTACTG                                |      |        |
| 2987rev1        | TTACAAGGAGTAATCAAACAC                                |      |        |
| 2994fd1         | ATGGGCACTTGGTCGAAAG                                  |      |        |
| 2994rev1        | TCAACTTAAATGGCTCTTTG                                 |      |        |
| 2995fd1         | ATGAGTGAAAAAGTGAAAGTAGC                              |      |        |
| 2995rev1        | TTAAATGTCTAACGTCAGTTCTTG                             |      |        |
| 2996fd1         | ATGAATTACGATGAGTTTAACC                               |      |        |
| 2996rev1        | TTACGTGCGTGGTTCAGATAG                                |      |        |
| tas2984fd2      | ATCTTAGAAGCGGGTGCTGC                                 |      |        |
| tas2984fd3      | CTCACATGGATTTTATTATCG                                |      |        |
| tas2984rev2     | CGCTTCTTGATAAGAACAGG                                 |      |        |
| tas2995fd2      | ATCGAACTGCCAGTCATTCC                                 |      |        |

**Supplementary Table 2**Proteomic analysis of 56 spots present in LGP32 and/or  $\Delta vsm$  ECP.

| Sample       | Score    | Hit/submitted | Intensity | ORF           | Product                                                                         | MW/pI   |
|--------------|----------|---------------|-----------|---------------|---------------------------------------------------------------------------------|---------|
| $\Delta vsm$ | 4,24E+08 | 24/124        | 72%       | VSA1062       | Metalloprotease                                                                 | 101/4,6 |
| $\Delta vsm$ | 1,88E+04 | 16/250        | 35%       | VSA1096       | Conserved<br>hypothetical protein                                               | 40/5,9  |
| $\Delta vsm$ | 1,58E+07 | 22/197        | 50%       | VS1430        | ABC transporter                                                                 | 36/5,4  |
| $\Delta vsm$ | 5,25E+03 | 10/162        | 30%       | VS2427        | Conserved<br>hypothetical protein                                               | 36/5,9  |
| $\Delta vsm$ | 6,31E+13 | 39/130        | 76%       | VS2864        | Conserved<br>hypothetical protein                                               | 94/4,6  |
| $\Delta vsm$ | 4,51E+06 | 19/250        | 27%       | VS2048        | Alanine<br>dehydrogenase                                                        | 39/5,2  |
| LGP32        | 8,00E+06 | 16/246        | 44%       | <b>VS1267</b> | Metalloprotease                                                                 | 66/5,5  |
| LGP32        | 1,19E+06 | 16/250        | 39%       | <b>VS1267</b> | Metalloprotease                                                                 | 66/5,5  |
| LGP32        | 1,66E+07 | 16/100        | 56%       | <b>VS1267</b> | Metalloprotease                                                                 | 66/5,5  |
| LGP32        | 9,21E+05 | 15/147        | 43%       | VS1430        | ABC transporter                                                                 | 36/5,4  |
| LGP32        | 1,54E+06 | 16/108        | 55%       | VS1430        | ABC transporter                                                                 | 36/5,4  |
| LGP32        | 2,49E+05 | 24/250        | 54%       | VS1430        | ABC transporter                                                                 | 36/5,4  |
| LGP32        | 1,73E+10 | 29/163        | 60%       | VSA576        | Conserved<br>hypothetical protein                                               | 74/5,3  |
| Both         | 2,52E+04 | 13/222        | 51%       | VSA205        | ABC transporter:<br>Substrate-binding<br>protein precursor;<br>phosphate uptake | 28/5,7  |
| Both         | 5,93E+04 | 15/250        | 25%       | VS1661        | Hypothetical protein                                                            | 58/5,3  |
| Both         | 8,46E+07 | 28/250        | 45%       | VSA576        | Conserved<br>hypothetical protein                                               | 74/5,3  |
| Both         | 2,40E+06 | 18/89         | 67%       | VSA310        | Outer membrane<br>protein                                                       | 35/4,4  |
| Both         | 5,64E+07 | 17/68         | 78%       | VS1068        | hypothetical protein                                                            | 36/4,2  |
| Both         | 6,28E+04 | 16/239        | 47%       | VS1055        | Lysine-arginine-<br>ornithine-binding<br>periplasmic protein                    | 28/5,4  |

|      |          |        |     |         |                                                                    |        |
|------|----------|--------|-----|---------|--------------------------------------------------------------------|--------|
|      |          |        |     |         | precursor                                                          |        |
| Both | 4,67E+06 | 19/250 | 33% | VSA1211 | ABC-type sugar transport system, periplasmic component             | 48/5,9 |
| Both | 5,25E+03 | 10/162 | 30% | VS2427  | Conserved hypothetical protein                                     | 37/5,9 |
| Both | 1,34E+06 | 16/250 | 39% | VS9     | Putative amino-acid ABC transporter-binding protein path precursor | 27/5   |
| Both | 9,7E+04  | 12/170 | 45% | VSA395  | Outer membrane protein OmpA                                        | 37/4,4 |
| Both | 1,47E+07 | 15/243 | 19% | VS861   | Long-chain fatty acid transport protein precursor                  | 45/4,5 |
